# Supplementary material for: Rapid identification of bovine MHCI haplotypes in genetically divergent cattle populations using next-generation sequencing
Source: PubMed Central journal article supplement (PMC5056950; doi:10.1007/s00251-016-0945-7), 2016-08-11

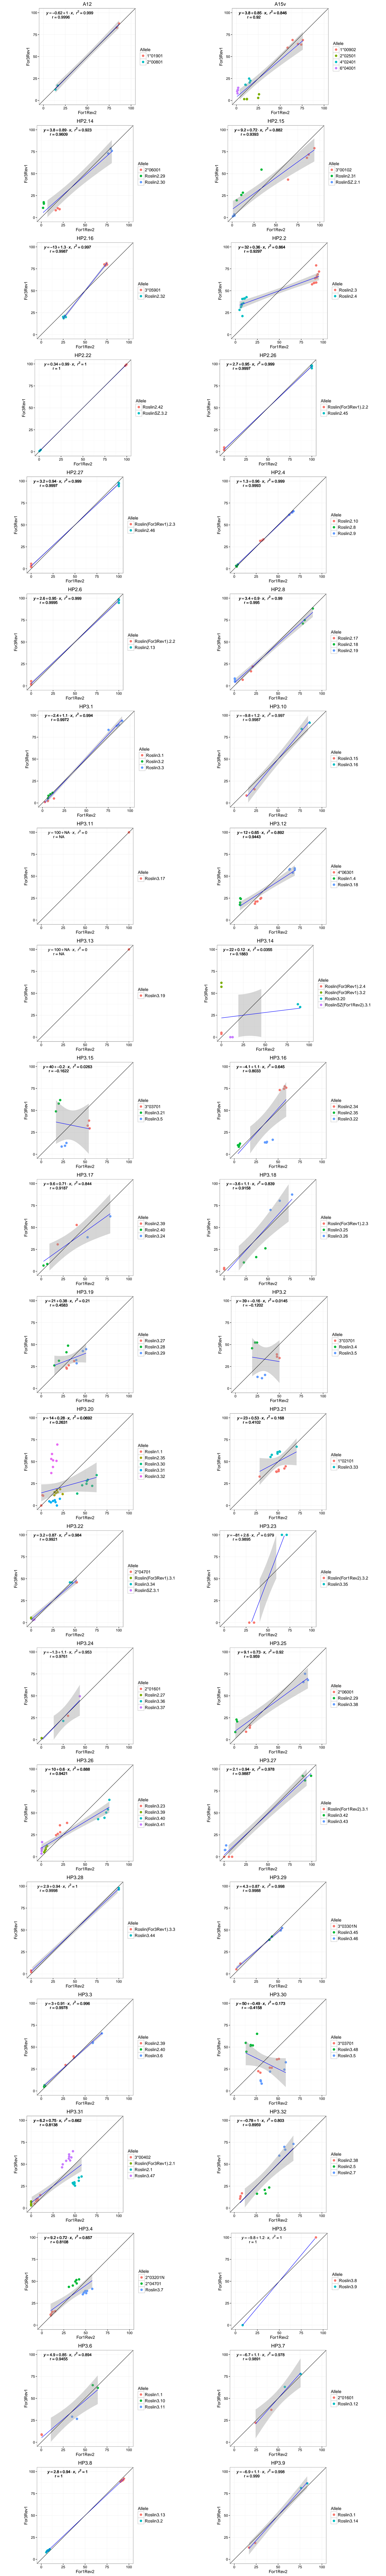

Supplement: 251_2016_945_MOESM12_ESM.pdf [file 251_2016_945_MOESM12_ESM.pdf]
